# Supplementary material
Source: PubMed Central journal article supplement (PMC6990673)

## Supplementary Online Content

Filippatos G, Angermann CE, Cleland JGF, et al. Global differences in characteristics, precipitants, and initial management of patients presenting with acute heart failure. *JAMA Cardiol*. Published online January 8, 2020. doi:10.1001/jamacardio.2019.5108

**eFigure 1.** Geographic Groupings

**eTable 1.** HF Characteristics/History, AHF Precipitants and Prior Outpatient Cardiovascular Medication: Overall and Divided by Region of the World

**eTable 2.** Presenting Vital Signs, Signs and Symptoms and Laboratory Values: Overall and Divided by Region of the World

**eTable 3.** Hospital Point of Entry, Time to Initial AHF Treatment and Types of Initial AHF Therapy Administered, and In-Hospital Outcomes

**eTable 4.** Multivariable Model Evaluating the Association of Timeliness and Type of IV Therapy With In-Hospital Mortality and LOS Adjusting for Severity

**eFigure 2.** Predicted Length of Stay With 95% Confidence Intervals

**eFigure 3.** Predicted Probability of Death With 95% Confidence Intervals

This supplementary material has been provided by the authors to give readers additional information about their work.

**eFigure 1.** Geographic Groupings

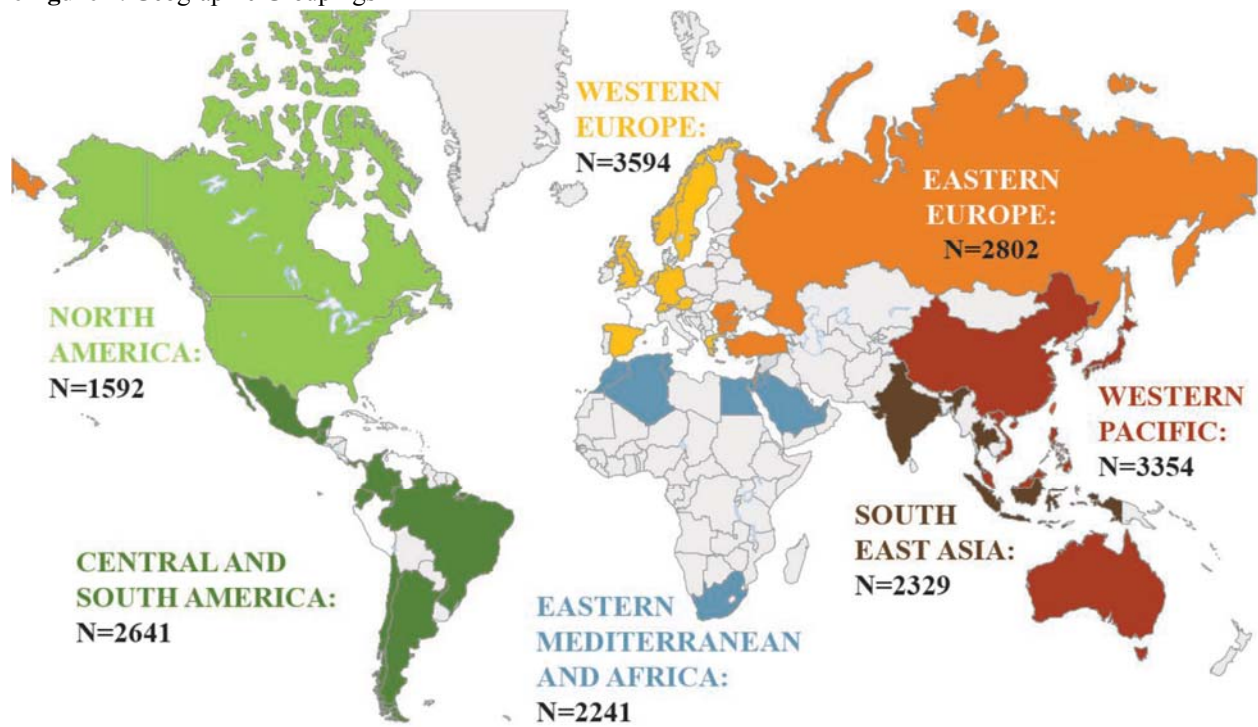

**Supplemental Table 1. HF Characteristics/history, AHF Precipitants and Prior Outpatient Cardiovascular Medication. Overall and Divided by Region of the World.**

(All values reported as N (%) unless otherwise noted)

|                                                     | All<br>N=18553       | Western<br>Europe<br>N=3594 | Eastern<br>Europe<br>N=2802 | Western<br>Pacific<br>N=3354 | South<br>East<br>Asia<br>N=2329 | North<br>America<br>N=1592 | Central<br>/So<br>America<br>N=2641 | East Med<br>&<br>Africa<br>N=2241 | P-<br>value |
|-----------------------------------------------------|----------------------|-----------------------------|-----------------------------|------------------------------|---------------------------------|----------------------------|-------------------------------------|-----------------------------------|-------------|
| <b>Heart Failure characteristics / history</b>      |                      |                             |                             |                              |                                 |                            |                                     |                                   |             |
| <i>HF Diagnosis</i>                                 | 10651<br>(57.4%)     | 2251<br>(62.6%)             | 1867<br>(66.6%)             | 1782 (53.1%)                 | 495<br>(21.3%)                  | 1275<br>(80.1%)            | 1594<br>(60.4%)                     | 1387<br>(61.9%)                   | <0.001      |
| DCHF                                                | 7902<br>(42.6%)      | 1343<br>(37.4%)             | 935 (33.4%)                 | 1572 (46.9%)                 | 1834<br>(78.7%)                 | 317 (19.9%)                | 1047<br>(39.6%)                     | 854 (38.1%)                       |             |
| <i>Etiology</i>                                     | 6195<br>(33.4%)      | 1139<br>(31.7%)             |                             |                              | 724<br>(31.1%)                  |                            | 622<br>(23.6%)                      |                                   | <0.001      |
| Ischemic                                            | 2863<br>(15.4%)      | 374<br>(10.4%)              | 1165<br>(41.6%)             | 1307 (39.0%)                 | 472<br>(20.3%)                  | 348 (21.9%)                | 451<br>(17.1%)                      | 890 (39.7%)                       |             |
| Hypertensive                                        | 2905<br>(15.7%)      | 510<br>(14.2%)              | 558 (19.9%)                 | 361 (10.8%)                  | 455<br>(19.5%)                  | 302 (19.0%)                | 342<br>(12.9%)                      | 345 (15.4%)                       |             |
| Cardiomyopathy                                      | 2006<br>(10.8%)      | 513<br>(14.3%)              | 302 (10.8%)                 | 305 (9.1%)                   | 135<br>(5.8%)                   | 369 (23.2%)                | 342<br>(12.9%)                      | 273 (12.2%)                       |             |
| Valvular                                            | 1541<br>(8.3%)       | 328<br>(9.1%)               | 369 (13.2%)                 | 307 (9.2%)                   | 183<br>(7.9%)                   | 94 (5.9%)                  | 139 (8.7%)                          | 248<br>(11.1%)                    |             |
| Other                                               | 3043<br>(16.4%)      | 730<br>(20.3%)              | 187 (6.7%)                  | 420 (12.5%)                  | 360<br>(15.5%)                  | 139 (8.7%)                 | 296<br>(11.2%)                      | 101 (4.5%)                        |             |
| Unknown/Unavailable                                 |                      |                             | 221 (7.9%)                  |                              |                                 | 340 (21.4%)                | 588<br>(22.3%)                      | 384 (17.2%)                       |             |
| <i>Prior HF-related Hospitalizations</i>            |                      |                             |                             |                              |                                 |                            |                                     |                                   |             |
| DCHF: Hospitalized = yes                            | 7129<br>(66.9%)      | 1487<br>(66.1%)             | 1230<br>(65.9%)             | 1343 (75.4%)                 | 328<br>(66.3%)                  | 921 (72.2%)                | 917<br>(57.5%)                      | 903 (65.1%)                       |             |
| # Hospitalizations within last 12 months            | 6702<br>1.0 (1 - 2)  | 1407<br>1.0 (0 - 2)         | 1157<br>1.0 (0 - 2)         | 1297<br>1.0 (1 - 2)          | 302<br>1.0 (1 - 2)              | 849<br>1.0 (1 - 2)         | 837<br>1.0 (1 - 2)                  | 853<br>1.0 (1 - 2)                | <0.001      |
| Median (IQR)                                        | 1317<br>(12.4%)      | 356<br>(15.8%)              | 291 (15.6%)                 | 219 (12.3%)                  | 39 (7.9%)                       | 142 (11.1%)                | 106<br>(6.6%)                       | 164 (11.8%)                       |             |
| 0                                                   | 3231<br>(30.3%)      | 655<br>(29.1%)              | 537 (28.8%)                 | 690 (38.7%)                  | 185<br>(37.4%)                  | 348 (27.3%)                | 437<br>(27.4%)                      | 379 (27.3%)                       |             |
| 1                                                   | 1160<br>(10.9%)      | 240<br>(10.7%)              | 194 (10.4%)                 | 205 (11.5%)                  | 94 (5.3%)                       | 167 (13.1%)                | 90 (7.1%)                           | 163 (11.8%)                       |             |
| 2                                                   | 496 (4.7%)           | 87 (3.9%)                   | 80 (4.3%)                   | 41 (2.3%)                    | 39 (7.9%)                       | 90 (7.1%)                  | 152<br>(9.5%)                       | 70 (5.0%)                         |             |
| 3                                                   | 227 (2.1%)           | 27 (1.2%)                   | 30 (1.6%)                   | 48 (2.7%)                    | 11 (2.2%)                       | 40 (3.1%)                  | 64 (4.0%)                           | 33 (2.4%)                         |             |
| 4                                                   | 271 (2.5%)           | 42 (1.9%)                   | 25 (1.3%)                   |                              | 17 (3.4%)                       | 62 (4.9%)                  | 39 (2.4%)                           | 44 (3.2%)                         |             |
| ≥ 5                                                 |                      |                             |                             |                              | 11 (2.2%)                       |                            | 39 (2.4%)                           |                                   |             |
| <i>Ejection fraction (during or prior)</i>          | 14709<br>40.3 (16.1) | 2473<br>39.5<br>(16.1)      | 2389<br>45.2 (14.6)         | 2907<br>41.5 (15.9)          | 1944<br>38.4<br>(15.2)          | 1035<br>38.1 (18.9)        | 2215<br>38.9<br>(16.8)              | 1746<br>38.2 (14.9)               | <0.001      |
| Mean (SD) Median /IQR)                              | 39.0 (28-54)         | 37.0 (26-53)                | 48.0 (35-56)                | 40.0 (29-55)                 | 35.0 (26-48)                    | 35.0 (20-55)               | 35.0 (25-53)                        | 35.0 (27-50)                      |             |
| <i>Ejection fraction (during or prior) &lt; 40%</i> | 7443<br>(40.1%)      | 1296<br>(36.1%)             | 790 (28.2%)<br>649 (23.2%)  | 1452 (43.3%)<br>571 (17.0%)  | 1121<br>(48.1%)                 | 558 (35.1%)<br>140 (8.8%)  | 1235<br>(46.8%)                     | 991 (44.2%)                       |             |



|                        | All<br>N=18553   | Western<br>Europe<br>N=3594 | Eastern<br>Europe<br>N=2802 | Western<br>Pacific<br>N=3354 | South<br>East<br>Asia<br>N=2329 | North<br>America<br>N=1592 | Central<br>/So<br>America<br>N=2641 | East Med<br>&<br>Africa<br>N=2241 | P-<br>valu<br>e |
|------------------------|------------------|-----------------------------|-----------------------------|------------------------------|---------------------------------|----------------------------|-------------------------------------|-----------------------------------|-----------------|
| β-blockers             | 9583<br>(51.7%)  | 2299<br>(64.0%)             | 1698<br>(60.6%)             | 1235 (36.8%)                 | 580<br>(24.9%)                  | 1127<br>(70.8%)            | 1480<br>(56.0%)                     | 1164<br>(51.9%)                   | <0.0001         |
| MRAs                   | 4673<br>(25.2%)  | 955<br>(26.6%)              | 841 (30.0%)                 | 913 (27.2%)                  | 260<br>(11.2%)                  | 376 (23.6%)                | 845<br>(32.0%)                      | 483 (21.6%)                       | <0.0001         |
| Diuretics              | 10025<br>(54.0%) | 2493<br>(69.4%)             | 1604<br>(57.2%)             | 1271 (37.9%)                 | 775<br>(33.3%)                  | 1119<br>(70.3%)            | 1431<br>(54.2%)                     | 1332<br>(59.4%)                   | <0.0001         |
| Loop<br>Diuretics      | 9305<br>(50.2%)  | 2347<br>(65.3%)             | 1370<br>(48.9%)             | 1193 (35.6%)                 | 734<br>(31.5%)                  | 1068<br>(67.1%)            | 1313<br>(49.7%)                     | 1280<br>(57.1%)                   | <0.0001         |
| Ivabradine             | 415 (2.2%)       | 105<br>(2.9%)               | 59 (2.1%)                   | 47 (1.4%)                    | 84 (3.6%)                       | 5 (0.3%)                   | 48 (1.8%)                           | 67 (3.0%)                         | <0.0001         |
| Digoxin                | 2005<br>(10.8%)  | 268<br>(7.5%)               | 422 (15.1%)                 | 442 (13.2%)                  | 208<br>(8.9%)                   | 148 (9.3%)                 | 269<br>(10.2%)                      | 248 (11.1%)                       | <0.0001         |
| Nitrates               | 2224<br>(12.0%)  | 445<br>(12.4%)              | 357 (12.7%)                 | 474 (14.1%)                  | 265<br>(11.4%)                  | 364 (22.9%)                | 139<br>(5.3%)                       | 180 (8.0%)                        | <0.0001         |
| Ca channel<br>blockers | 2649<br>(14.3%)  | 669<br>(18.6%)              | 441 (15.7%)                 | 429 (12.8%)                  | 235<br>(10.1%)                  | 311 (19.5%)                | 265<br>(10.0%)                      | 299 (13.3%)                       | <0.0001         |
| Anti-<br>thrombotics   | 11249<br>(60.6%) | 2661<br>(74.0%)             | 1777 (63.4)                 | 1725 (51.4%)                 | 914<br>(39.2%)                  | 1186<br>(74.5%)            | 1425<br>(54.0%)                     | 1561<br>(69.7%)                   | <0.0001         |
| Anti-platelets         | 7653<br>(41.2%)  | 1304<br>(36.3%)             | 1170<br>(41.8%)             | 1366 (40.7%)                 | 770<br>(33.1%)                  | 890 (55.9%)                | 956<br>(36.2%)                      | 1197<br>(53.4%)                   | <0.0001         |
| Anti-<br>coagulant     | 4717<br>(25.4%)  | 1620<br>(45.1%)             | 779 (27.8%)                 | 461 (13.7%)                  | 193<br>(8.3%)                   | 567 (35.6%)                | 586<br>(22.2%)                      | 511 (22.8%)                       | <0.0001         |
| Amiodarone             | 1273<br>(6.9%)   | 286<br>(8.0%)               | 219 (7.8%)                  | 102 (3.0%)                   | 71 (3.0%)                       | 162 (10.2%)                | 257<br>(9.7%)                       | 176 (7.9%)                        | <0.0001         |
| Statins                | 7045<br>(38.0%)  | 1723<br>(47.9%)             | 737 (26.3%)                 | 1103 (32.9%)                 | 789<br>(33.9%)                  | 892 (56.0%)                | 862<br>(32.6%)                      | 939 (41.9%)                       | <0.0001         |

ACE inhibitor = angiotensin-converting-enzyme inhibitor; AHF = acute heart failure; ARB = angiotensin II receptor blockers; DCHF = decompensated chronic heart failure; HT = hypertension; med = medication; resp. = respiratory; WRF = worsening renal function

**Supplemental Table 2. Presenting Vital Signs, signs and symptoms and laboratory values. Overall and Divided by Regions of the World**

(All values reported as N (%) or median (IQR) unless otherwise noted)

|                                                   | All<br>N=18553   | Western<br>Europe<br>N=3594 | Eastern<br>Europe<br>N=2802 | Western<br>Pacific<br>N=3354 | South<br>East<br>Asia<br>N=2329 | North<br>America<br>N=1592 | Central/So<br>America<br>N=2641 | East<br>Med &<br>Africa<br>N=2241 | P-<br>value |
|---------------------------------------------------|------------------|-----------------------------|-----------------------------|------------------------------|---------------------------------|----------------------------|---------------------------------|-----------------------------------|-------------|
| <b>Presenting characteristics / Clinical Exam</b> |                  |                             |                             |                              |                                 |                            |                                 |                                   |             |
| SBP (mmHg)                                        | 16995            | 3168                        | 2479                        | 3110                         | 2162                            | 1578                       | 2363                            | 2135                              | <0.0001     |
| n                                                 | 133.3            | 135.1                       | 137.3                       | 132.6                        | 132.0                           | 138.1                      | 128.2                           | 130.6                             |             |
| Mean (SD)                                         | (29.2)           | (28.1)                      | (28.7)                      | (28.3)                       | (28.7)                          | (31.9)                     | (28.7)                          | (30.4)                            |             |
| Median (IQR)                                      | 130 (110-150)    | 131 (115-150)               | 133 (120-155)               | 130 (110-149)                | 130 (110-150)                   | 134 (115-156)              | 125 (109-143)                   | 126 (110-148)                     |             |
| DBP (mmHg)                                        | 16975            | 3158                        | 2479                        | 3106                         | 2160                            | 1575                       | 2363                            | 2134                              | <0.0001     |
| n                                                 | 79.2             | 78.3                        | 81.2                        | 79.8                         | 80.2                            | 81.3                       | 77.4 (17.1)                     | 76.5                              |             |
| Mean (SD)                                         | (17.3)           | (17.3)                      | (15.1)                      | (17.3)                       | (16.4)                          | (20.8)                     | 77 (65-89)                      | (17.5)                            |             |
| Median (IQR)                                      | 80 (69-90)       | 77 (66-90)                  | 80 (70-90)                  | 80 (70-90)                   | 80 (70-90)                      | 79 (67-93)                 |                                 | 75 (65-86)                        |             |
| Heart rate (b.p.m)                                | 16932            | 3135                        | 2477                        | 3096                         | 2159                            | 1578                       | 2362                            | 2125                              | <0.0001     |
| n                                                 | 89.4             | 87.4                        | 88.5                        | 89.0                         | 94.0                            | 89.6                       | 87.3 (23.2)                     | 91.7                              |             |
| Mean (SD)                                         | (22.9)           | (23.4)                      | (24.0)                      | (22.4)                       | (21.9)                          | (21.2)                     | 84 (71-100)                     | (22.3)                            |             |
| Median (IQR)                                      | 86 (73-102)      | 84 (70-100)                 | 82 (70-100)                 | 86 (73-101)                  | 92 (80-107)                     | 87 (74-103)                |                                 | 90 (76-104)                       |             |
| Rhythm                                            | 9478<br>(51.1%)  | 1503<br>(41.8%)             | 1331<br>(47.5%)             | 1879<br>(56.0%)              | 1280<br>(55.0%)                 | 883<br>(55.5%)             | 1378<br>(52.2%)                 | 1224<br>(54.6%)                   | <0.0001     |
| Sinus Rhythm                                      | 4222<br>(22.8%)  | 1108<br>(30.8%)             | 979<br>(34.9%)              | 732<br>(21.8%)               | 198<br>(8.5%)                   | 281<br>(17.7%)             | 463<br>(17.5%)                  | 461<br>(20.6%)                    |             |
| Atrial fib/flutter                                | 769<br>(4.1%)    | 235<br>(6.5%)               | 96<br>(3.4%)                | 70<br>(2.1%)                 | 18<br>(0.8%)                    | 146<br>(9.2%)              | 157<br>(5.9%)                   | 47<br>(2.1%)                      |             |
| Pacemaker rhythm                                  | 176<br>(0.9%)    | 27<br>(0.8%)                | 8<br>(0.3%)                 | 31<br>(0.9%)                 | 9<br>(0.4%)                     | 29<br>(1.8%)               | 32<br>(1.2%)                    | 40<br>(1.8%)                      |             |
| Bradycardia/AV block                              |                  |                             |                             |                              |                                 |                            | 113<br>(4.3%)                   | 147<br>(6.6%)                     |             |
| Other                                             | 925<br>(5.0%)    | 106<br>(2.9%)               | 17<br>(0.6%)                | 154<br>(4.6%)                | 253<br>(10.9%)                  | 135<br>(8.5%)              | 498<br>(18.9%)                  | 322<br>(14.4%)                    |             |
| Unavailable                                       | 2983<br>(16.1%)  | 615<br>(17.1%)              | 371<br>(13.2%)              | 488<br>(14.5%)               | 571<br>(24.5%)                  | 118<br>(7.4%)              |                                 |                                   |             |
| Symptoms & Signs                                  | 17943<br>(96.7%) | 3450<br>(96.0%)             | 2781<br>(99.3%)             | 3188<br>(95.1%)              | 2249<br>(96.6%)                 | 1532<br>(96.2%)            | 2548<br>(96.5%)                 | 2195<br>(97.9%)                   |             |
| Symptoms assessed                                 | 17289<br>(93.2%) | 3334<br>(92.8%)             | 2768<br>(98.8%)             | 2915<br>(86.9%)              | 1991<br>(85.5%)                 | 1539<br>(96.7%)            | 2547<br>(96.4%)                 | 2195<br>(97.9%)                   |             |
| Dyspnea at rest                                   | 13603<br>(73.3%) | 2518<br>(70.1%)             | 2353<br>(84.0%)             | 2530<br>(75.4%)              | 1765<br>(75.8%)                 | 605<br>(38.0%)             | 1924<br>(72.9%)                 | 1908<br>(85.1%)                   |             |
| PND                                               | 9100<br>(49.0%)  | 1485<br>(41.3%)             | 1705<br>(60.8%)             | 1871<br>(55.8%)              | 986<br>(42.3%)                  | 295<br>(18.5%)             | 1162<br>(44.0%)                 | 1596<br>(71.2%)                   |             |
| Peripheral Edema                                  | 11400<br>(61.4%) | 2365<br>(65.8%)             | 2107<br>(75.2%)             | 1725<br>(51.4%)              | 913<br>(39.2%)                  | 942<br>(59.2%)             | 1899<br>(71.9%)                 | 1449<br>(64.7%)                   |             |
| Pulmonary rales                                   | 10278<br>(55.4%) | 1663<br>(46.3%)             | 1983<br>(70.8%)             | 1645<br>(49.0%)              | 1148<br>(49.3%)                 | 381<br>(23.9%)             | 1652<br>(62.6%)                 | 1806<br>(80.6%)                   |             |
| JVP                                               |                  |                             |                             |                              |                                 |                            | 1159                            | 1084                              |             |
| < 6 cm                                            | 6311<br>(34.0%)  | 820<br>(22.8%)              | 907<br>(32.4%)              | 724<br>(21.6%)               | 1028<br>(44.1%)                 | 589<br>(37.0%)             | 1159<br>(43.9%)                 | 1084<br>(48.4%)                   |             |
| 6-10 cm                                           | 2401<br>(12.9%)  | 316<br>(8.8%)               | 384<br>(13.7%)              | 245<br>(7.3%)                | 471<br>(20.2%)                  | 165<br>(10.4%)             | 442<br>(16.7%)                  | 378<br>(16.9%)                    |             |
| >10 cm                                            |                  |                             |                             |                              |                                 |                            | 498                             | 449                               |             |
| S3 gallop                                         | 2682<br>(14.5%)  | 362<br>(10.1%)              | 436<br>(15.6%)              | 272<br>(8.1%)                | 467<br>(20.1%)                  | 198<br>(12.4%)             | 498<br>(18.9%)                  | 449<br>(20.0%)                    |             |
| Pleural effusion                                  | 1228<br>(6.6%)   | 142<br>(4.0%)               | 87<br>(3.1%)                | 207<br>(6.2%)                | 90<br>(3.9%)                    | 226<br>(14.2%)             | 219<br>(8.3%)                   | 257<br>(11.5%)                    |             |
|                                                   | 2190<br>(11.8%)  | 264<br>(7.3%)               | 791<br>(28.2%)              | 337<br>(10.0%)               | 244<br>(10.5%)                  | 122<br>(7.7%)              | 523<br>(19.8%)                  | 635<br>(28.3%)                    |             |

|                                                                          | All<br>N=18553                              | Western<br>Europe<br>N=3594                | Eastern<br>Europe<br>N=2802                | Western<br>Pacific<br>N=3354               | South<br>East<br>Asia<br>N=2329            | North<br>America<br>N=1592                 | Central/So<br>America<br>N=2641           | East<br>Med &<br>Africa<br>N=2241          | P-<br>value |
|--------------------------------------------------------------------------|---------------------------------------------|--------------------------------------------|--------------------------------------------|--------------------------------------------|--------------------------------------------|--------------------------------------------|-------------------------------------------|--------------------------------------------|-------------|
|                                                                          | 4787<br>(25.8%)                             | 1172<br>(32.6%)                            |                                            | 986<br>(29.4%)                             | 284<br>(12.2%)                             | 416<br>(26.1%)                             |                                           | 615<br>(27.4%)                             |             |
| Chest X-ray<br>Yes, taken<br>Signs of<br>congestion*                     | 15918<br>(85.8%)<br>11451<br>(61.7%)        | 3216<br>(89.5%)<br>2375<br>(66.1%)         | 2513<br>(89.7%)<br>1986<br>(70.9%)         | 2708<br>(80.7%)<br>1791<br>(53.4%)         | 1639<br>(70.4%)<br>1038<br>(44.6%)         | 1521<br>(95.5%)<br>860<br>(54.0%)          | 2287<br>(86.6%)<br>1676<br>(63.5%)        | 2034<br>(90.8%)<br>1725<br>(77.0%)         | <0.0001     |
| <b>Cardiac biomarkers</b>                                                |                                             |                                            |                                            |                                            |                                            |                                            |                                           |                                            |             |
| NT-proBNP (ng/L)<br>n (%)<br>Median<br>(IQR)                             | 5648<br>(30.4%)<br>4392<br>(2072-<br>9174)  | 1696<br>(47.2%)<br>4785<br>(2204-<br>9222) | 366<br>(13.1%)<br>4321<br>(1858-<br>11287) | 1715<br>(51.1%)<br>3837<br>(1889-<br>8220) | 520<br>(22.3%)<br>5180<br>(2310-<br>12850) | 490<br>(30.8%)<br>3825<br>(2034-<br>8414)  | 542<br>(20.5%)<br>4439<br>(2047-<br>9206) | 319<br>(14.2%)<br>4942<br>(2400-<br>9462)  | <0.0001     |
| BNP (ng/L)<br>n (%)<br>Median<br>(IQR)                                   | 3388<br>(18.3%)<br>915<br>(408-<br>1888)    | 448<br>(12.5%)<br>847<br>(388-<br>1593)    | 198<br>(7.1%)<br>970<br>(486-<br>1832)     | 761<br>(22.7%)<br>1137<br>500-2340         | 150<br>(6.4%)<br>483<br>(163-<br>1220)     | 957<br>(60.1%)<br>767<br>(392-<br>1545)    | 294<br>(11.1%)<br>1225<br>(541-2458)      | 580<br>(25.9%)<br>937<br>(382-<br>2206)    | <0.0001     |
| Troponin-I (µg/L)<br>n (%)<br>Median<br>(IQR)                            | 5470<br>(29.5%)<br>0.04<br>(0.02-<br>0.11)  | 790<br>(22.0%)<br>0.04<br>(0.02-<br>0.10)  | 565<br>(20.2%)<br>0.04<br>(0.01-<br>0.12)  | 1531<br>(45.6%)<br>0.05<br>(0.02-<br>0.16) | 423<br>(18.2%)<br>0.05<br>(0.02-<br>0.23)  | 1013<br>(63.6%)<br>0.04<br>(0.02-<br>0.08) | 526<br>(19.9%)<br>0.04<br>(0.01-0.10)     | 622<br>(27.8%)<br>0.02<br>(0.01-<br>0.07)  | 0.0333      |
| Troponin-T (µg/L)<br>n (%)<br>Median<br>(IQR)                            | 3589<br>(19.3%)<br>0.04<br>(0.02-<br>0.08)  | 898<br>(25.0%)<br>0.03<br>(0.02-<br>0.06)  | 268<br>(9.6%)<br>0.05<br>(0.02-<br>0.16)   | 496<br>(14.8%)<br>0.04<br>(0.02-<br>0.06)  | 536<br>(23.0%)<br>0.05<br>(0.02-<br>0.20)  | 245<br>(15.4%)<br>0.02<br>(0.01-<br>0.04)  | 480<br>(18.2%)<br>0.04<br>(0.02-0.06)     | 666<br>(29.7%)<br>0.04<br>(0.02-<br>0.09)  | <0.0001     |
| Hs-cTNT (µg/L)<br>n (%)<br>Median<br>(IQR)                               | 849<br>(4.6%)<br>0.04<br>(0.02-<br>0.08)    | 404<br>(11.2%)<br>0.04<br>(0.02-<br>0.07)  | 69 (2.5%)<br>0.02<br>(0.01-<br>0.06)       | 149<br>(4.4%)<br>0.03<br>(0.02-<br>0.08)   | 36<br>(1.5%)<br>0.07<br>(0.02-<br>0.21)    | 3 (0.2%)<br>0.01<br>(0.00-<br>0.03)        | 96 (3.6%)<br>0.04<br>(0.02-0.08)          | 92 (4.1%)<br>0.05<br>(0.02-<br>0.21)       | 0.0154      |
| <b>Renal function test results</b>                                       |                                             |                                            |                                            |                                            |                                            |                                            |                                           |                                            |             |
| BUN (mmol/L)<br>n (%)<br>Median (IQR)                                    | 6390<br>(34.4%)<br>8.2 (5.8-<br>12.5)       | 145<br>(4.0%)<br>10.0 (6.4-<br>15.7)       | 336<br>(12.0%)<br>9.6 (6.4-<br>14.6)       | 1909<br>(56.9%)<br>7.7 (5.6-<br>11.1)      | 1003<br>(43.1%)<br>7.9 (5.6-<br>12.5)      | 1326<br>(83.3%)<br>8.2 (5.7-<br>13.2)      | 1128<br>(42.7%)<br>8.8 (6.4-<br>13.2)     | 543<br>(24.2%)<br>8.2 (6.0-<br>13.6)       | <0.0001     |
| Urea (mmol/L)<br>n (%)<br>Median (IQR)                                   | 9763<br>(52.6%)<br>8.2 (6.0-<br>12.1)       | 2848<br>(79.2%)<br>9.2 (6.7-<br>13.7)      | 1604<br>(57.2%)<br>7.7 (5.8-<br>10.6)      | 953<br>(28.4%)<br>7.1 (5.3-<br>9.8)        | 1016<br>(43.6%)<br>6.2 (4.4-<br>8.8)       | 266<br>(16.7%)<br>10.0 (6.9-<br>15.8)      | 1490<br>(56.4%)<br>8.2 (6.0-<br>11.7)     | 1586<br>(70.8%)<br>9.0 (6.2-<br>14.0)      | <0.0001     |
| eGFR [MDRD]<br>(mL/min/1.73 m <sup>2</sup> )<br>n (%)<br>Median<br>(IQR) | 11282<br>(60.8%)<br>64.4<br>(44.7-<br>87.1) | 2055<br>(57.2%)<br>63.8<br>(45.0-<br>85.5) | 820<br>(29.3%)<br>71.5<br>(50.4-<br>96.3)  | 1150<br>(34.3%)<br>63.8<br>(41.7-<br>87.5) | 2129<br>(91.4%)<br>64.4<br>(45.3-<br>87.2) | 1441<br>(90.5%)<br>56.8<br>(37.9-<br>78.3) | 2280<br>(86.3%)<br>65.7<br>(46.2-86.6)    | 1407<br>(62.8%)<br>67.1<br>(46.6-<br>91.5) | <0.0001     |
| <b>Other labs</b>                                                        |                                             |                                            |                                            |                                            |                                            |                                            |                                           |                                            |             |
| Hemoglobin (g/L)<br>n (%)<br>Median<br>(IQR)                             | 15934<br>(85.9%)<br>126.0                   | 3122<br>(86.9%)<br>126.0                   | 2496<br>(89.1%)<br>131.0                   | 2738<br>(81.6%)<br>128.0                   | 1995<br>(85.7%)<br>121.0                   | 1567<br>(98.4%)<br>120.0                   | 2144<br>(81.2%)<br>128.0                  | 1872<br>(83.5%)<br>120.0                   | <0.0001     |

|  | <b>All<br/>N=18553</b> | <b>Western<br/>Europe<br/>N=3594</b> | <b>Eastern<br/>Europe<br/>N=2802</b> | <b>Western<br/>Pacific<br/>N=3354</b> | <b>South<br/>East<br/>Asia<br/>N=2329</b> | <b>North<br/>America<br/>N=1592</b> | <b>Central/So<br/>America<br/>N=2641</b> | <b>East<br/>Med &amp;<br/>Africa<br/>N=2241</b> | <b>P-<br/>value</b> |
|--|------------------------|--------------------------------------|--------------------------------------|---------------------------------------|-------------------------------------------|-------------------------------------|------------------------------------------|-------------------------------------------------|---------------------|
|  | (110-140)              | (110-141)                            | (116-144)                            | (111-143)                             | (105-136)                                 | (103-134)                           | (112-143)                                | (106-135)                                       |                     |

*JVP = Jugular venous pressure; PND= paroxysmal nocturnal dyspnea; \*Signs of congestion = Cephalization/vascular engorgement, Interstitial edema, Pulmonary edema*



**Supplemental Table 3. Hospital Point of Entry, Time to Initial AHF Treatment and Types of Initial AHF Therapy Administered, and In-hospital Outcomes.** (All values reported as N (%) or median (IQR) unless otherwise noted)

|                                                                                  | All<br>N=1855<br>3         | Wester<br>n<br>Europe<br>N=3594 | Eastern<br>Europe<br>N=2802 | Wester<br>n<br>Pacific<br>N=3354 | South<br>East<br>Asia<br>N=2329 | North<br>Americ<br>a<br>N=1592 | Central/<br>So<br>America<br>N=2641 | East<br>Med &<br>Africa<br>N=2241 | P-<br>val<br>ue  |
|----------------------------------------------------------------------------------|----------------------------|---------------------------------|-----------------------------|----------------------------------|---------------------------------|--------------------------------|-------------------------------------|-----------------------------------|------------------|
| <b>Hospital Point of Entry</b>                                                   |                            |                                 |                             |                                  |                                 |                                |                                     |                                   |                  |
| Emergency Room                                                                   | 11636<br>(62.7%)           | 2760<br>(76.8%)                 | 1048<br>(37.4%)             | 1526<br>(45.5%)                  | 1447<br>(62.1%)                 | 1237<br>(77.7%)                | 2085<br>(78.9%)                     | 1533<br>(68.4%)                   | <0.0<br>001      |
| Heart Failure<br>Facilities                                                      | 923<br>(5.0%)              | 125<br>(3.5%)                   | 271<br>(9.7%)               | 211<br>(6.3%)                    | 84 (3.6%)                       | 63 (4.0%)                      | 135 (5.1%)                          | 34 (1.5%)                         |                  |
| Cardiac Ward                                                                     | 3348<br>(18.0%)            | 359<br>(10.0%)                  | 998<br>(35.6%)              | 1113<br>(33.2%)                  | 210<br>(9.0%)                   | 222<br>(13.9%)                 | 145 (5.5%)                          | 301<br>(13.4%)                    |                  |
| Cardiac/<br>Coronary ICU                                                         | 1454<br>(7.8%)             | 94 (2.6%)                       | 333<br>(11.9%)              | 268<br>(8.0%)                    | 390<br>(16.7%)                  | 18 (1.1%)                      | 132 (5.0%)                          | 219<br>(9.8%)                     |                  |
| General/ Medical/<br>Surgical ICU                                                | 482<br>(2.6%)              | 114<br>(3.2%)                   | 23 (0.8%)                   | 85 (2.5%)                        | 116<br>(5.0%)                   | 6 (0.4%)                       | 55 (2.1%)                           | 83 (3.7%)                         |                  |
| Other                                                                            | 698<br>(3.8%)              | 138<br>(3.8%)                   | 129<br>(4.6%)               | 150<br>(4.5%)                    | 82 (3.5%)                       | 40 (2.5%)                      | 89 (3.4%)                           | 70 (3.1%)                         |                  |
| Missing                                                                          | 12 (0.1%)                  | 4 (0.1%)                        | 0                           | 1 (0.0%)                         | 0                               | 6 (0.4%)                       | 0                                   | 1 (0.0%)                          |                  |
| <b>Patient Pathway while hospitalized</b>                                        |                            |                                 |                             |                                  |                                 |                                |                                     |                                   |                  |
| ED + ICU/CCU                                                                     | 2248<br>(12.1%)            | 287<br>(8.0%)                   | 261<br>(9.3%)               | 134<br>(4.0%)                    | 161<br>(6.9%)                   | 355<br>(22.3%)                 | 404<br>(15.3%)                      | 646<br>(28.8%)                    | *<br><0.0<br>001 |
| ED + General<br>ward                                                             | 5900<br>(31.8%)            | 1800<br>(50.1%)                 | 582<br>(20.8%)              | 1003<br>(29.9%)                  | 648<br>(27.8%)                  | 696<br>(43.7%)                 | 845<br>(32.0%)                      | 326<br>(14.5%)                    |                  |
| ED + ICU/CCU +<br>General ward                                                   | 2283<br>(12.3%)            | 347<br>(9.7%)                   | 174<br>(6.2%)               | 327<br>(9.7%)                    | 561<br>(24.1%)                  | 108<br>(6.8%)                  | 456<br>(17.3%)                      | 310<br>(13.8%)                    |                  |
| <b>ACUTE HF-RELATED THERAPIES within 6 hours</b>                                 |                            |                                 |                             |                                  |                                 |                                |                                     |                                   |                  |
| <b>IV THERAPIES</b>                                                              |                            |                                 |                             |                                  |                                 |                                |                                     |                                   |                  |
| Loop diuretics                                                                   | 14162<br>(76.3%)           | 2529<br>(70.4%)                 | 2519<br>(89.9%)             | 2192<br>(65.4%)                  | 1886<br>(81.0%)                 | 1091<br>(68.5%)                | 2090<br>(79.1%)                     | 1855<br>(82.8%)                   | <0.0<br>001      |
| Vasodilators/<br>Nitrates                                                        | 2917<br>(15.7%)            | 200<br>(5.6%)                   | 460<br>(16.4%)              | 1026<br>(30.6%)                  | 304<br>(13.1%)                  | 86 (5.4%)                      | 593<br>(22.5%)                      | 248<br>(11.1%)                    | <0.0<br>001      |
| Inotropic agents                                                                 | 1634<br>(8.8%)             | 153<br>(4.3%)                   | 317<br>(11.3%)              | 449<br>(13.4%)                   | 314<br>(13.5%)                  | 50 (3.1%)                      | 213 (8.1%)                          | 138<br>(6.2%)                     | <0.0<br>001      |
| <b>OTHER THERAPIES</b>                                                           |                            |                                 |                             |                                  |                                 |                                |                                     |                                   |                  |
| Oral loop<br>diuretics                                                           | 1119<br>(6.0%)             | 228<br>(6.3%)                   | 162<br>(5.8%)               | 454<br>(13.5%)                   | 119<br>(5.1%)                   | 26 (1.6%)                      | 75 (2.8%)                           | 55 (2.5%)                         | <0.0<br>001      |
| Other oral<br>diuretics                                                          | 226<br>(1.2%)              | 65 (1.8%)                       | 89 (3.2%)                   | 13 (0.4%)                        | 9 (0.4%)                        | 13 (0.8%)                      | 16 (0.6%)                           | 21 (0.9%)                         | <0.0<br>001      |
| MRAs                                                                             | 2304<br>(12.4%)            | 219<br>(6.1%)                   | 770<br>(27.5%)              | 687<br>(20.5%)                   | 206<br>(8.8%)                   | 16 (1.0%)                      | 310<br>(11.7%)                      | 96 (4.3%)                         | <0.0<br>001      |
| Opiates                                                                          | 81 (0.4%)                  | 21 (0.6%)                       | 26 (0.9%)                   | 11 (0.3%)                        | 0                               | 18 (1.1%)                      | 5 (0.2%)                            | 0                                 | <0.0<br>001      |
| Oxygen                                                                           | 3046<br>(16.4%)            | 597<br>(16.6%)                  | 362<br>(12.9%)              | 741<br>(22.1%)                   | 498<br>(21.4%)                  | 227<br>(14.3%)                 | 305<br>(11.5%)                      | 316<br>(14.1%)                    | <0.0<br>001      |
| Non-invasive<br>ventilation                                                      | 220<br>(1.2%)              | 62 (1.7%)                       | 15 (0.5%)                   | 21 (0.6%)                        | 23 (1.0%)                       | 40 (2.5%)                      | 18 (0.7%)                           | 41 (1.8%)                         | <0.0<br>001      |
| <b>Time from admission to first initiation of AHF therapy:</b>                   |                            |                                 |                             |                                  |                                 |                                |                                     |                                   |                  |
| For any AHF<br>therapy (hrs)<br>n<br>Median (IQR)                                | 18136<br>1.0 (0.2-<br>3.0) | 3469<br>1.2 (0.3-<br>4.3)       | 2778<br>0.4 (0.0-<br>1.4)   | 3264<br>1.0 (0.3-<br>2.6)        | 2297<br>0.6 (0.1-<br>1.9)       | 1578<br>3.0 (1.4-<br>5.6)      | 2605<br>0.9 (0.2-<br>2.8)           | 2145<br>1.0 (0.2-<br>2.5)         | <0.0<br>001      |
| If 1 <sup>st</sup> treatment =<br>IV loop diuretic<br>(hrs)<br>n<br>Median (IQR) | 12793<br>1.0 (0.2-<br>3.0) | 2450<br>1.5 (0.4-<br>4.0)       | 2260<br>0.4 (0.0-<br>1.5)   | 1611<br>1.2 (0.4-<br>3.1)        | 1629<br>0.7 (0.1-<br>2.1)       | 1139<br>3.5 (2.0-<br>5.7)      | 1933<br>0.9 (0.2-<br>2.7)           | 1771<br>0.9 (0.2-<br>2.1)         | <0.0<br>001      |
| If 1 <sup>st</sup> treatment =<br>IV Vasodilators<br>(hrs)                       | 766                        | 43                              | 67                          | 321                              | 51                              | 44                             | 195                                 | 45                                |                  |

|                                                                          | All<br>N=18553                                 | Western<br>Europe<br>N=3594                  | Eastern<br>Europe<br>N=2802                  | Western<br>Pacific<br>N=3354                 | South<br>East<br>Asia<br>N=2329         | North<br>America<br>N=1592               | Central/<br>South<br>America<br>N=2641        | East<br>Med &<br>Africa<br>N=2241        | P-<br>value |
|--------------------------------------------------------------------------|------------------------------------------------|----------------------------------------------|----------------------------------------------|----------------------------------------------|-----------------------------------------|------------------------------------------|-----------------------------------------------|------------------------------------------|-------------|
| n<br>Median (IQR)                                                        | 0.9 (0.3-<br>2.2)                              | 1.0 (0.0-<br>2.3)                            | 0.4 (0.0-<br>0.9)                            | 1.0 (0.3-<br>1.9)                            | 0.8 (0.1-<br>1.8)                       | 1.3 (0.3-<br>4.0)                        | 1.1 (0.3-<br>3.1)                             | 0.9 (0.3-<br>2.6)                        | <0.0<br>001 |
| If 1 <sup>st</sup> treatment =<br>IV Inotrope (hrs)<br>n<br>Median (IQR) | 1122<br>0.7 (0.0-<br>2.0)                      | 110<br>1.1 (0.2-<br>3.1)                     | 234<br>0.0 (0.0-<br>0.5)                     | 250<br>0.9 (0.3-<br>2.5)                     | 219<br>0.6 (0.07-<br>1.35)              | 50<br>2.5 (0.7-<br>6.3)                  | 162<br>1.3 (0.3-<br>3.5)                      | 97<br>1.0 (0.3-<br>2.6)                  | <0.0<br>001 |
| <b>Hospital LOS</b>                                                      |                                                |                                              |                                              |                                              |                                         |                                          |                                               |                                          |             |
| LOS (days)<br>n<br>Mean (SD)<br>Median (IQR)                             | 18102<br>10.3<br>(10.21)<br>8.0 (5.0-<br>12.0) | 3489<br>11.1<br>(8.65)<br>9.0 (6.0-<br>13.0) | 2761<br>10.4<br>(8.27)<br>9.0 (6.0-<br>13.0) | 3298<br>11.5<br>(8.72)<br>9.0 (7.0-<br>14.0) | 2292<br>7.1 (5.51)<br>6.0 (4.0-<br>8.0) | 1565<br>8.8 (9.40)<br>6.0 (4.0-<br>10.0) | 2525<br>12.6<br>(15.68)<br>8.0 (5.0-<br>14.0) | 2172<br>8.8 (11.8)<br>6.0 (4.0-<br>10.0) | <0.0<br>001 |
| <b>In-hospital Mortality</b>                                             |                                                |                                              |                                              |                                              |                                         |                                          |                                               |                                          |             |
| Deaths during<br>Index<br>Hospitalization                                | 451<br>(2.4%)                                  | 105<br>(2.9%)                                | 41 (1.5%)                                    | 56 (1.7%)                                    | 37 (1.6%)                               | 27 (1.7%)                                | 116 (4.4%)                                    | 69 (3.1%)                                | <0.0<br>001 |

AHF = acute heart failure; ED = Emergency department; ICU/CCU = Intensive / Critical Care unit; HRS = hours; LOS = length of stay; \* reflecting comparison of all possible pathways

**Supplemental Table 4. Multivariable model evaluating the association of timeliness and type of IV therapy with in-hospital mortality and LOS adjusting for severity**

| Variables                         | Higher Mortality (unadjusted) | Higher Mortality (adjusted)           | Longer LOS (unadjusted)           | Longer LOS (adjusted)                         |
|-----------------------------------|-------------------------------|---------------------------------------|-----------------------------------|-----------------------------------------------|
| Age                               | 1.01 (0.999 - 1.02)<br>p=0.07 | 1.01 (1.00 - 1.02)<br>p=0.006 (Older) | -0.05 (-0.06 - -0.03)<br>p<0.0001 | -0.04 (-0.05 - -0.02)<br>p<0.0001 (Younger)   |
| SBP <115 mmHg                     | 1.24 (0.77 - 1.99)<br>p=0.38  | 1.05 (0.63-1.74)<br>p=0.86            | 2.45 (1.55 -3.36)<br>p<0.0001     | 1.43 (0.51 - 2.36)<br>p=0.002                 |
| HF Etiology - Ischemia            | 1.60 (1.10 - 2.32)<br>p=0.014 | 1.65 (1.11-2.44)<br>p=0.01            | 0.93 (0.42 - 1.44)<br>p<0.0001    | 0.77 (0.26 - 1.29)<br>p=0.003                 |
| HF Etiology - Valvular            | 2.10 (1.39 - 3.19)<br>p=0.001 | 2.10 (1.36 - 3.25)<br>p=0.001         | 2.40 (1.65 - 2.84)<br>p<0.0001    | 2.01 (1.38 - 2.65)<br>p=0.0001                |
| CXR signs of congestion           | 1.89 (1.3 - 2.76)<br>p=0.002  | 2.03 (1.39 - 2.97)<br>p<0.0001        | 0.97 (0.52 -1.42)<br>p<0.0001     | 1.02 (0.57 - 1.47)<br>p<0.0001                |
| Creatinine >2.75 mg/dL            | 0.64 (0.24 - 1.05)<br>P=0.002 | 1.85 (1.20 - 2.85)<br>p=0.005         | 1.55 (0.71 - 2.40)<br>p = 0.001   | 1.16 (0.31 - 2.00)<br>p=0.007                 |
| Time to treatment                 | 1.00 (0.97 - 1.02)<br>p=0.84  | 1.0 (0.97 - 1.02)<br>p=0.75           | 0.035 (-0.001 - 0.071)<br>p= 0.05 | 0.03 (-0.00 - 0.07)<br>p=0.08                 |
|                                   | <b>Treatment Type</b>         |                                       |                                   |                                               |
| Diuretics alone                   | 2.08 (0.29 - 15.0)<br>p=0.47  | 1.95 (0.27 - 14.2)<br>p =0.51         | -1.14 (-2.87 -0.59)<br>p=0.20     | -1.04 (-2.75 - 0.66)<br>p=0.231               |
| Vasodilators/nitrates ± diuretics | 1.80 (0.24 - 13.2)<br>p=0.56  | 1.89 (0.26 - 14.1)<br>p = 0.53        | -2.13 (-3.90 - -0.37)<br>p=0.02   | -1.79 (-3.53 - -0.04)<br>p=0.05 (if not used) |
| Inotropes ± diuretics             | 4.8 (0.66 - 35.3)<br>p=0.12   | 3.70 (0.50 - 27.3)<br>p = 0.20        | 0.08 (-1.73 - 1.89)<br>p=0.93     | -0.60 (-2.40 - 1.19)<br>p=0.51                |

**Supplemental Figure 2**  
**Predicted Length of Stay**  
**With 95% Confidence Intervals**

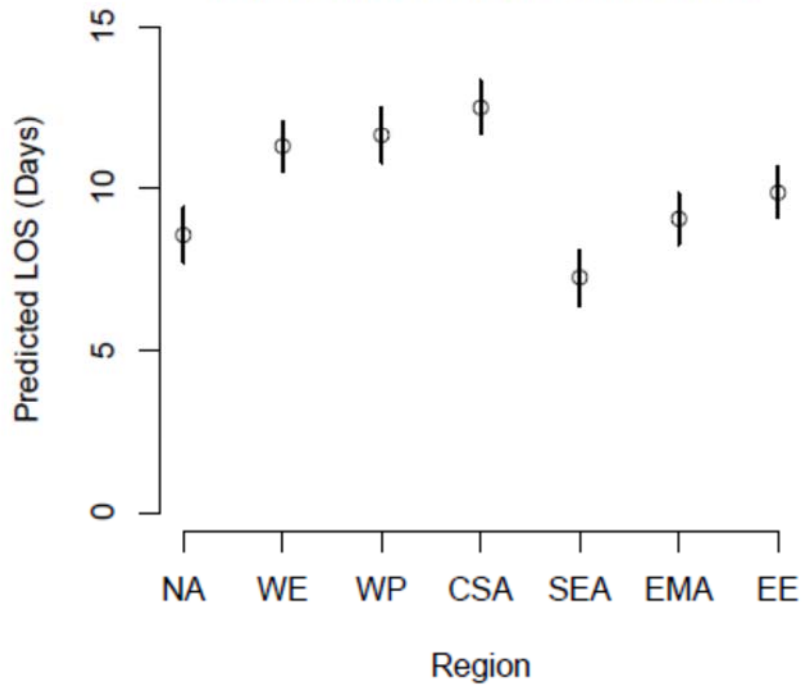

### Supplemental Figure 3 Predicted Probability of Death With 95% Confidence Intervals

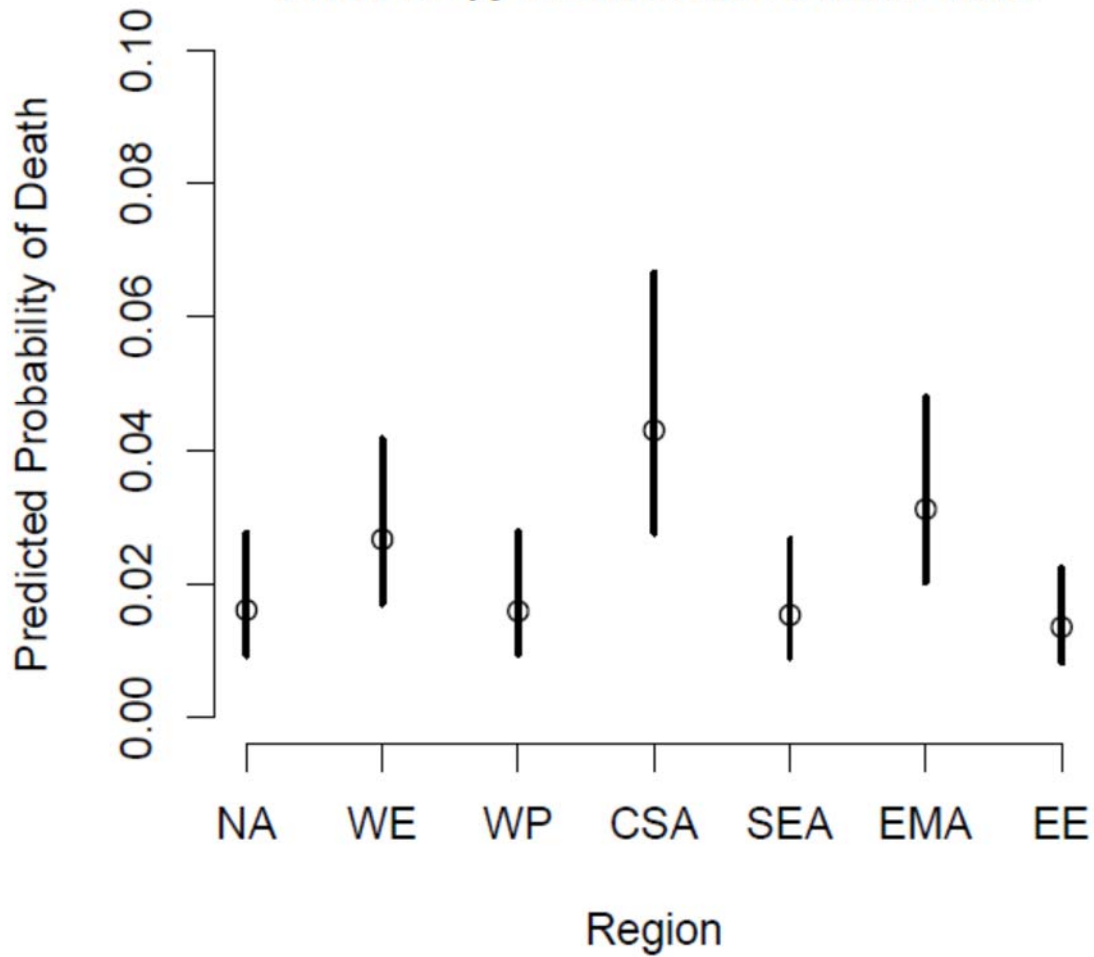

Supplement: jamacardiol-5-401-s001.pdf [file jamacardiol-5-401-s001.pdf]
